# Supplementary material for: Disposable graphene sensor with an internal reference electrode for stripping analysis of heavy metals
Source: Royal Society of Chemistry journal article supplement (doi:10.1039/c8ay00221e), 2018-01-01
Supplement: c8ay00221e1.pdf [file c8ay00221e1.pdf]

Supporting information for

## Disposable graphene sensor with an internal reference electrode for heavy metals stripping analysis

Shiwei Liu <sup>a, b</sup>, Tongshun Wu <sup>a</sup>, Fenghua Li <sup>a\*</sup>, Qixian Zhang <sup>a</sup>, Xiandui Dong <sup>a\*</sup>, Li Niu <sup>a</sup>

<sup>a</sup> State Key Laboratory of Electroanalytical Chemistry, c/o Engineering Laboratory for Modern Analytical Techniques, Changchun Institute of Applied Chemistry, Chinese Academy of Sciences, Changchun 130022, P. R. China.

<sup>b</sup> University of Chinese Academy of Sciences, Beijing 100039, P. R. China.

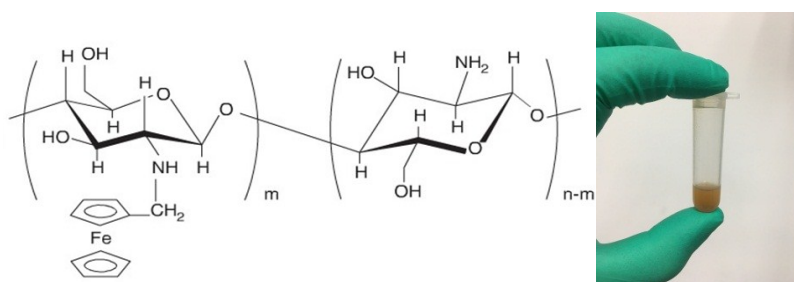

Figure S1. Molecular structure and the suspension photo of Chit-Fc

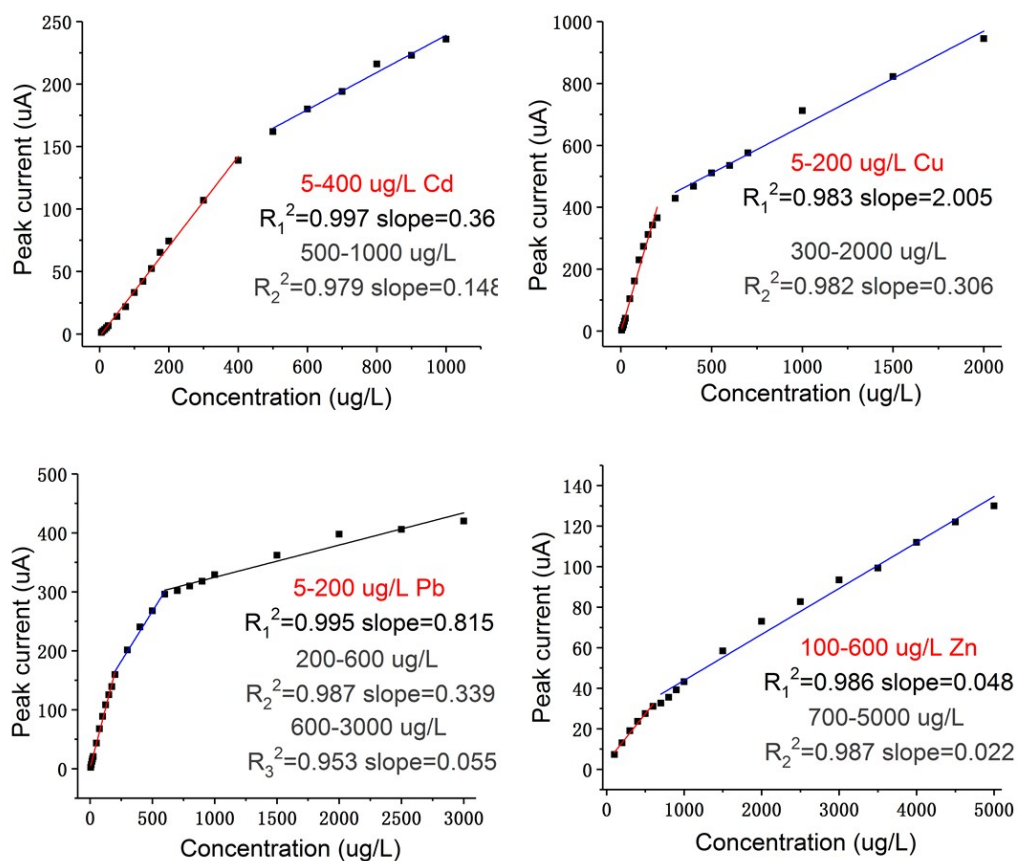

Figure S2. Broad linear ranges of heavy metals stripping signals
